# Supplementary material for: Batimastat Induces Cytotoxic and Cytostatic Effects in In Vitro Models of Hematological Tumors
Source: MDPI journal article supplement (doi:10.3390/ijms25084554), 2024-04-22
Supplement: s1 [file s1]

## Supplementary Material

### **Batimastat induces cytotoxic and cytostatic effects in in vitro models of hematological tumors**

**Raquel Alves <sup>1,2,3,†</sup>, Ana Pires <sup>1,4,†</sup>, Joana Jorge <sup>1,2,3</sup>, Joana Balça-Silva <sup>1,5</sup>,  
Ana Cristina Gonçalves <sup>1,2,3,\*</sup>, and Ana Bela Sarmiento-Ribeiro <sup>1,2,3,6</sup>**

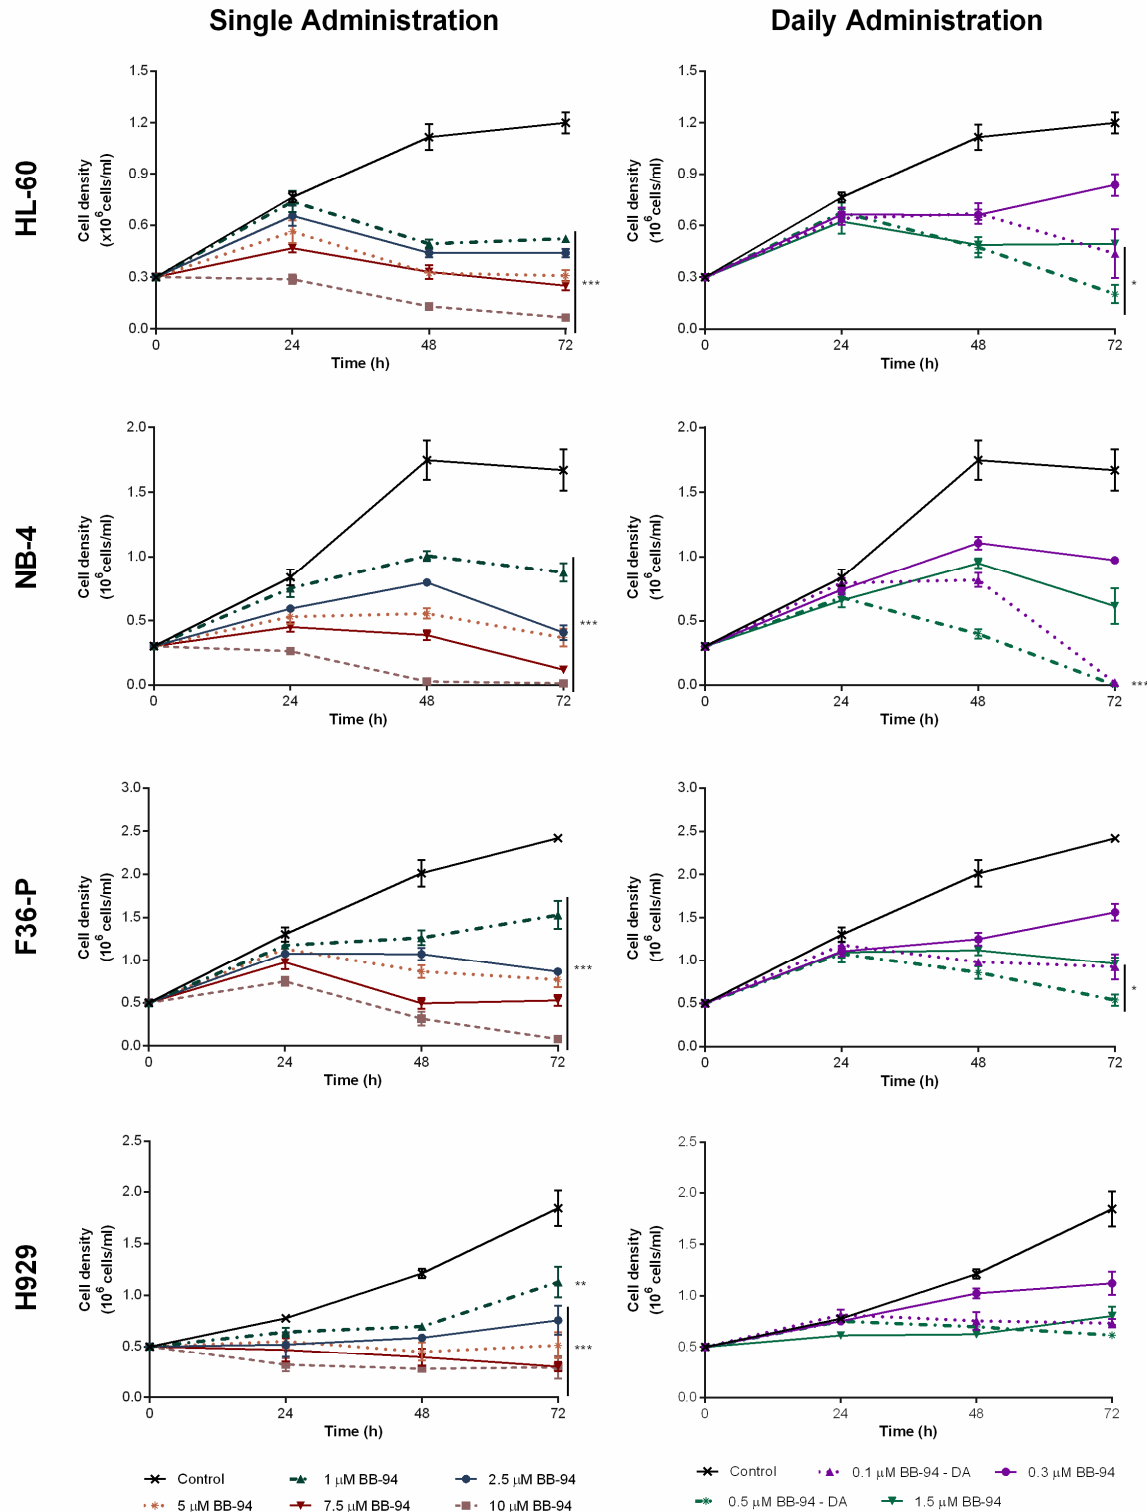

**Supplementary Figure S1.** Cell density curves of batimastat (BB-94) in a single administration and daily administration schedules for the four hematological cell lines. Cells were incubated in the absence and presence of different concentrations of BB-94 during 72h with different administration schemes. Results were expressed in number of cells ( $10^6$  cell per mL) and represent the mean  $\pm$  SEM obtained from 4 independent experiments. \*  $p < 0.05$ ; \*\*  $p < 0.01$ ; \*\*\*  $p < 0.001$  (comparison with control).

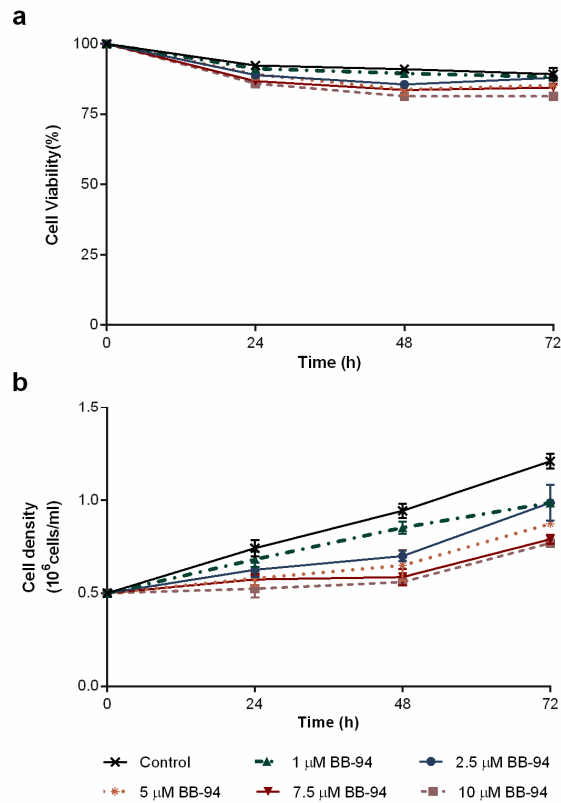

**Supplementary Figure S2.** Dose-response curves (a) and cell density curves (b) of batimastat (BB-94) in a single administration in IMC cell lines. Cells were incubated in the absence and presence of different concentrations of BB-94 during 72h. Results were expressed in percentage (%) and in number of cells ( $10^6$  cell per mL), and represent the mean  $\pm$  SEM obtained from 4 independent experiments.

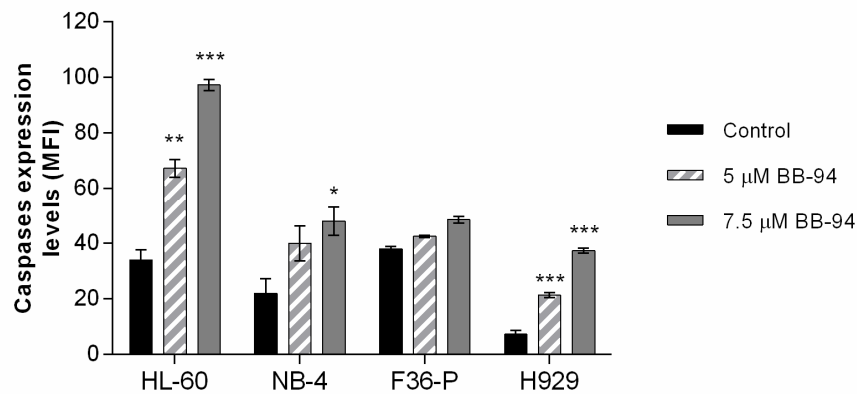

**Supplementary Figure S3.** Caspases expression levels induced by Batimastat. The caspases levels assessment was determined by flow cytometry using ApoSTAT probe as markers of apoptosis. Data are expressed d by mean fluorescence intensity (MFI) for ApoSTAT labeling Results were obtained after 48h of incubation and represent mean  $\pm$  SEM of at least 3 independent experiments. \* p<0.05; \*\* p<0.01; \*\*\* p<0.001 (comparison with control).

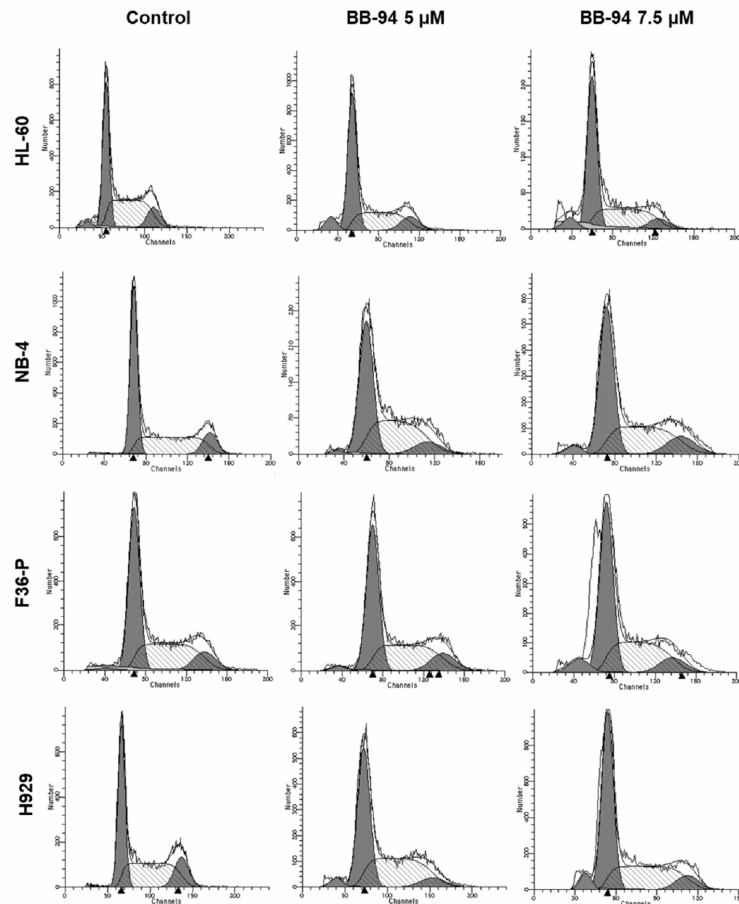

**Supplementary Figure S4.** Representative histograms of cell cycle distribution upon BB-94 treatment

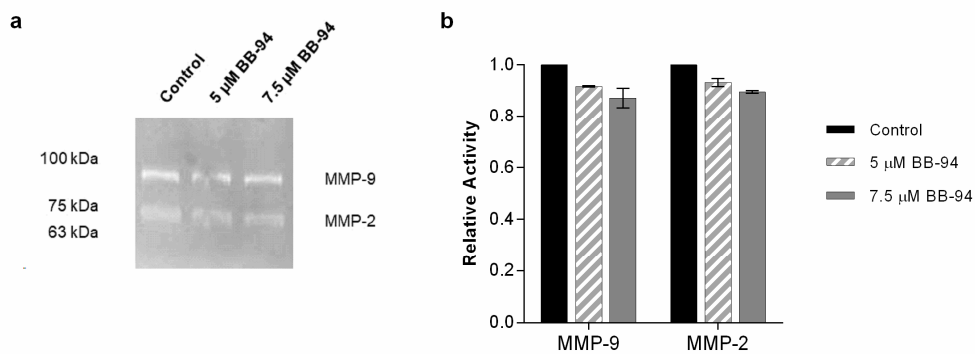

**Supplementary Figure S5.** Analysis of the effect of BB-94 on gelatinase secretion and activity in NB-4 cells. (a) A representative gel of gelatin zymography of untreated and BB-94-treated cells. The two bands observed correspond to both gelatinases, the MMP-2 with 72 kDa and the MMP-9 with 92 kDa. (b) The MMP-2 and MMP-9 activity were quantified and compared with the control. Data are represented as mean  $\pm$  SEM of 3 independent experiments.
